# Supplementary material for: A High-Fat Diet Induces Low-Grade Cochlear Inflammation in CD-1 Mice
Source: MDPI journal article supplement (doi:10.3390/ijms23095179), 2022-05-06
Supplement: s1 [file s1]

Supplementary Figure S2. Formulation and caloric information of control diet  
(Research Diets, New Brunswick, NJ, D12450J)

| Class description | Ingredients                            | Grams     |
|-------------------|----------------------------------------|-----------|
| Protein           | Casein, Lactic, 30 Mesh                | 200.00 g  |
| Protein           | Cystine, L                             | 3.00 g    |
| Carbohydrate      | Starch, Corn                           | 506.20 g  |
| Carbohydrate      | Lodex 10                               | 125.00 g  |
| Carbohydrate      | Sucrose, Fine Granulated               | 72.80 g   |
| Fiber             | Solka Floc, FCC200                     | 50.00 g   |
| Fat               | Soybean Oil, USP                       | 25.00 g   |
| Fat               | Lard                                   | 20.00 g   |
| Mineral           | S10026B                                | 50.00 g   |
| Vitamin           | Choline Bitartrate                     | 2.00 g    |
| Vitamin           | V10001C                                | 1.00 g    |
| Dye               | Dye, Yellow FD&C #5, Alum. Lake 35-42% | 0.04 g    |
| Dye               | Dye, Blue FD&C #1, Alum. Lake 35-42%   | 0.01 g    |
| Total:            |                                        | 1055.05 g |

**Caloric Information** Physiological Fuel Values

|                 |             |
|-----------------|-------------|
| Protein:        | 20 % Kcal   |
| Fat:            | 10 % Kcal   |
| Carbohydrate:   | 70 % Kcal   |
| Energy density: | 3.82 Kcal/g |
