# Supplementary material for: A High-Fat Diet Induces Low-Grade Cochlear Inflammation in CD-1 Mice
Source: MDPI journal article supplement (doi:10.3390/ijms23095179), 2022-05-06
Supplement: s1 [file s1]

Supplementary Figure S1. Formulation and caloric information of a high-fat diet  
(Research Diets, New Brunswick, NJ, D12492I)

### Formulation

| Class description | Ingredients                          | Grams    |
|-------------------|--------------------------------------|----------|
| Protein           | Casein, Lactic, 30 Mesh              | 200.00 g |
| Protein           | Cystine, L                           | 3.00 g   |
| Carbohydrate      | Lodex 10                             | 125.00 g |
| Carbohydrate      | Sucrose, Fine Granulated             | 72.80 g  |
| Fiber             | Solka Floc, FCC200                   | 50.00 g  |
| Fat               | Lard                                 | 245.00 g |
| Fat               | Soybean Oil, USP                     | 25.00 g  |
| Mineral           | S10026B                              | 50.00 g  |
| Vitamin           | Choline Bitartrate                   | 2.00 g   |
| Vitamin           | V10001C                              | 1.00 g   |
| Dye               | Dye, Blue FD&C #1, Alum. Lake 35-42% | 0.05 g   |
| Total:            |                                      | 773.85 g |

### Caloric Information Physiological Fuel Values

|                 |             |
|-----------------|-------------|
| Protein:        | 20 % Kcal   |
| Fat:            | 60 % Kcal   |
| Carbohydrate:   | 20 % Kcal   |
| Energy density: | 5.21 Kcal/g |
